# Supplementary material for: Common Peptides Study of Aminoacyl-tRNA Synthetases
Source: PubMed Central journal article supplement (PMC3103580; doi:10.1371/journal.pone.0020361), 2011-05-27
Supplement: pone.0020361.s009.pdf [file pone.0020361.s009.pdf]

Table S1. Occurrence of frequent CPs in aaRSs on sequences with a resolved structure

| CP      | PDB ID | Uniprot ID | Known binding site                                              |
|---------|--------|------------|-----------------------------------------------------------------|
| GFGLG   | 1B8A   | SYD_PYRKO  | Adenosine Triphosphate                                          |
| PPHGG   | 1B8A   | SYD_PYRKO  | Adenosine Triphosphate *                                        |
| EVETP   | 1BBU   | SYK1_ECOLI | -                                                               |
| FRNEG   | 1BBU   | SYK1_ECOLI | Lysine                                                          |
| GIGDR   | 1BBU   | SYK1_ECOLI | Lysine                                                          |
| HNPEF   | 1BBU   | SYK1_ECOLI | Lysine *                                                        |
| DDTNP   | 1EUQ   | SYQ_ECOLI  | 5'-O-[N-(L-Glutaminy)]-Sulfamoyl]Adenosine                      |
| DPRMPT  | 1EUQ   | SYQ_ECOLI  | -                                                               |
| GVIHW   | 1EUQ   | SYQ_ECOLI  | tRNA binding region                                             |
| LRAKI   | 1EUQ   | SYQ_ECOLI  | tRNA binding region *                                           |
| SKRKL   | 1EUQ   | SYQ_ECOLI  | 5'-O-[N-(L-Glutaminy)]-Sulfamoyl]Adenosine                      |
| TRFPP   | 1EUQ   | SYQ_ECOLI  | 5'-O-[N-(L-Glutaminy)]-Sulfamoyl]Adenosine                      |
| WDDPR   | 1EUQ   | SYQ_ECOLI  | -                                                               |
| YDRLF   | 1EUQ   | SYQ_ECOLI  | -                                                               |
| FIGKD   | 1F4L   | SYM_PYRAB  | Methionine                                                      |
| PYANG   | 1F4L   | SYM_PYRAB  | Methionine                                                      |
| AADIL   | 1I6K   | SYW_BACST  | Tryptophanyl-5'Amp                                              |
| GGRYD   | 1KMN   | SYH_ECOLI  | Adenosine Triphosphate                                          |
| LDLRR   | 1WYD   | SYD_SULTO  | -                                                               |
| GEIIGGS | 1X54   | SYN_PYRHO  | 4-Amino-1,4-Dioxobutan-2-Aminium<br>Adenosine- 5'-Monophosphate |
| GFGLG   | 1X54   | SYN_PYRHO  | 4-Amino-1,4-Dioxobutan-2-Aminium<br>Adenosine- 5'-Monophosphate |
| GGSQRE  | 1X54   | SYN_PYRHO  | 4-Amino-1,4-Dioxobutan-2-Aminium<br>Adenosine- 5'-Monophosphate |
| KAFYM   | 1X54   | SYN_PYRHO  | 4-Amino-1,4-Dioxobutan-2-Aminium<br>Adenosine- 5'-Monophosphate |
| LDLRR   | 1X54   | SYN_PYRHO  | (4S)-2-Methyl-2,4-Pentenediol *                                 |
| CGGTH   | 1YFR   | SYA_AQUAE  | -                                                               |
| DTGMG   | 1YFR   | SYA_AQUAE  | Adenosine Triphosphate                                          |
| FEMLGN  | 1YFR   | SYA_AQUAE  | Adenosine Triphosphate                                          |
| GDYFK   | 1YFR   | SYA_AQUAE  | -                                                               |
| GMGLE   | 1YFR   | SYA_AQUAE  | Adenosine Triphosphate                                          |
| GPCGP   | 1YFR   | SYA_AQUAE  | Magnesium Ion *                                                 |
| GRGYV   | 1YFR   | SYA_AQUAE  | -                                                               |
| HHTFF   | 1YFR   | SYA_AQUAE  | Adenosine Triphosphate                                          |
| LRDFD   | 1YFR   | SYA_AQUAE  | -                                                               |
| SFGDY   | 1YFR   | SYA_AQUAE  | Adenosine Triphosphate *                                        |
| TYGFP   | 1YFR   | SYA_AQUAE  | -                                                               |
| DFQAR   | 2DQ3   | SYS_AQUAE  | 5'-O-(N-(L-Seryl)-Sulfamoyl)Adenosine *                         |
| EISSCS  | 2DQ3   | SYS_AQUAE  | 5'-O-(N-(L-Seryl)-Sulfamoyl)Adenosine                           |
| FQARR   | 2DQ3   | SYS_AQUAE  | 5'-O-(N-(L-Seryl)-Sulfamoyl)Adenosine *                         |
| LNGSG   | 2DQ3   | SYS_AQUAE  | 5'-O-(N-(L-Seryl)-Sulfamoyl)Adenosine                           |
| NGSGLA  | 2DQ3   | SYS_AQUAE  | 5'-O-(N-(L-Seryl)-Sulfamoyl)Adenosine                           |
| PTAEV   | 2DQ3   | SYS_AQUAE  | 5'-O-(N-(L-Seryl)-Sulfamoyl)Adenosine                           |
| QLPKF   | 2DQ3   | SYS_AQUAE  | -                                                               |
| REISS   | 2DQ3   | SYS_AQUAE  | 5'-O-(N-(L-Seryl)-Sulfamoyl)Adenosine                           |
| TA EVP  | 2DQ3   | SYS_AQUAE  | 5'-O-(N-(L-Seryl)-Sulfamoyl)Adenosine                           |
| TLNGS   | 2DQ3   | SYS_AQUAE  | 5'-O-(N-(L-Seryl)-Sulfamoyl)Adenosine                           |

|        |      |            |                                         |
|--------|------|------------|-----------------------------------------|
| VHTLN  | 2DQ3 | SYS_AQUAE  | 5'-O-(N-(L-Seryl)-Sulfamoyl)Adenosine   |
| MGCYG  | 2J3L | SYP_ENTFA  | '5'-O-(N-(L-Prolyl)-Sulfamoyl)Adenosine |
| PTHEE  | 2J3L | SYP_ENTFA  | '5'-O-(N-(L-Prolyl)-Sulfamoyl)Adenosine |
| LRIEDT | 2O5R | SYE1_THEMA | -                                       |
| PSPTG  | 2O5R | SYE1_THEMA | Chloride Ion                            |
| RFAPSP | 2O5R | SYE1_THEMA | Chloride Ion                            |
| RIEDTD | 2O5R | SYE1_THEMA | -                                       |

\* The CP is distant by at most 3 residues from the site.
